# Supplementary material for: Pepper CabZIP63 acts as a positive regulator during Ralstonia solanacearum or high temperature–high humidity challenge in a positive feedback loop with CaWRKY40
Source: PubMed Central journal article supplement (PMC4809298; doi:10.1093/jxb/erw069), 2016-03-01
Supplement: supp_erw069_supplementary_figures_S1_S6_tables_S1_S5.pdf [file supp_erw069_supplementary_figures_S1_S6_tables_S1_S5.pdf]

**Pepper CabZIP63 acts as a positive regulator during *Ralstonia solanacearum* or high-temperature-high-humidity challenge in a positive feedback loop with CaWRKY40**

Lei Shen<sup>1,2,#</sup>, Zhiqin Liu<sup>1,2,#</sup>, Sheng Yang<sup>1,2,#</sup>, Tong Yang<sup>1,3</sup>, Jiaqi Liang<sup>1,3</sup>, Jiayu Wen<sup>1,2</sup>, Yanyan Liu<sup>1,2</sup>, Jiazhi Li<sup>1,3</sup>, Lanping Shi<sup>1,2</sup>, Qian Tang<sup>1,2</sup>, Wei Shi<sup>1,2</sup>, Jiong Hu<sup>1,2</sup>, Cailing Liu<sup>1,2</sup>, Yangwen Zhang<sup>1,2</sup>, Wei Lin<sup>1,2</sup>, Rongzhang Wang<sup>1,2</sup>, Huanxin Yu<sup>1,2</sup>, Shaoliang Mou<sup>1,3</sup>, Ansar hussain<sup>1,2</sup>, Wei Cheng<sup>1,2</sup>, Hanyang Cai<sup>1,2</sup>, Li He<sup>4</sup>, Deyi Guan<sup>1,2</sup>, Yang Wu<sup>4,\*</sup> and Shuilin He<sup>1,2,\*</sup>

**Supplementary Data**

**Fig. S1**

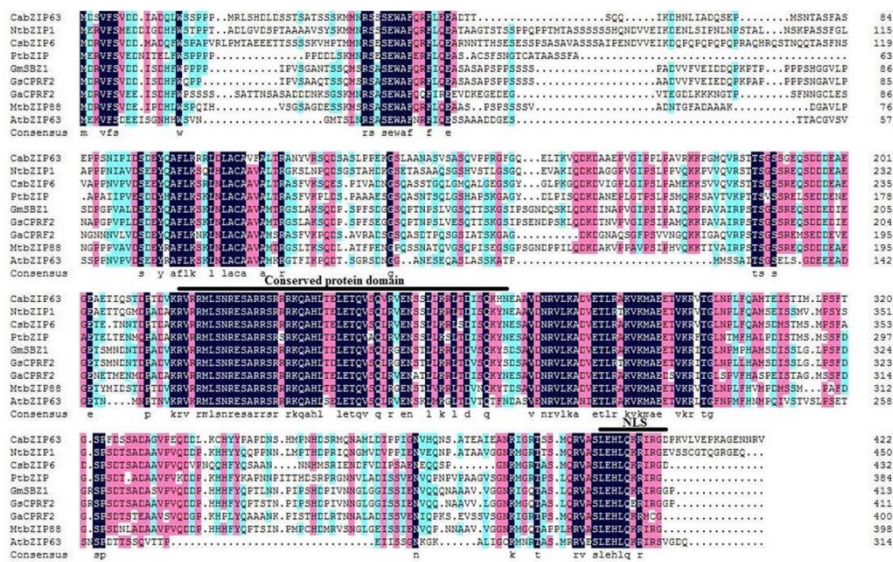

**Fig. S1.** Comparison of amino acid sequences deduced from pepper *CabZIP63* with the representative closely related proteins from other plant species including *NtbZIP1* (*Nicotianatabacum*, AY061648.1), *CsbZIP6* (*Camellia sinensis*, KC008716.1), *PtPOPTR\_0013s03800g* (*Populus trichocarpa*, XM\_002319036.2), *GmSBZ1* (*Glycine max*, NM\_001251024), *MtbZIP88* (*Medicago truncatula*, KEH43021), *GsCPRF2* (*Glycine soja*, KHN04932.1), *GaCPRF2* (*Gossypium arboretum*, KHG10545.1) and *AtbZIP63* (*Arabidopsis thaliana*, NP\_568508.2). Green shading, 50%-75% identity; red shading, 75%-100% identity; black shading, 100% identity. The alignment was carried out using DNAMAN5 (Lynnon Biosoft, USA).

**Fig. S2**

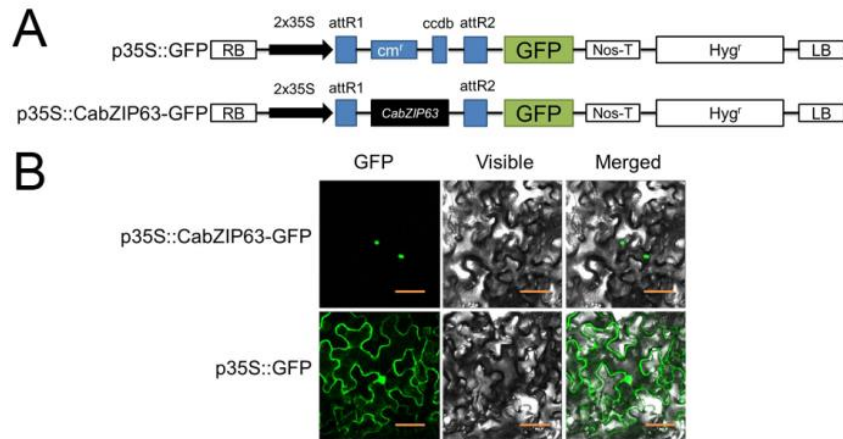

**Fig. S2.** Subcellular localization of CabZIP63 in *N. benthamiana* leaves using an *Agrobacterium*-infiltration based approach. **(A)** Schematic representation of *35S::CabZIP63-GFP* and *35S::GFP* constructs. **(B)** CabZIP63-GFP exclusively localized in the nucleus of *N. benthamiana* leaves; green fluorescent protein (GFP) localized throughout the whole cells. Bars = 50  $\mu$ m. All images were taken by Leica confocal microscopy at 48 hours after agro-infiltration.

**Fig. S3**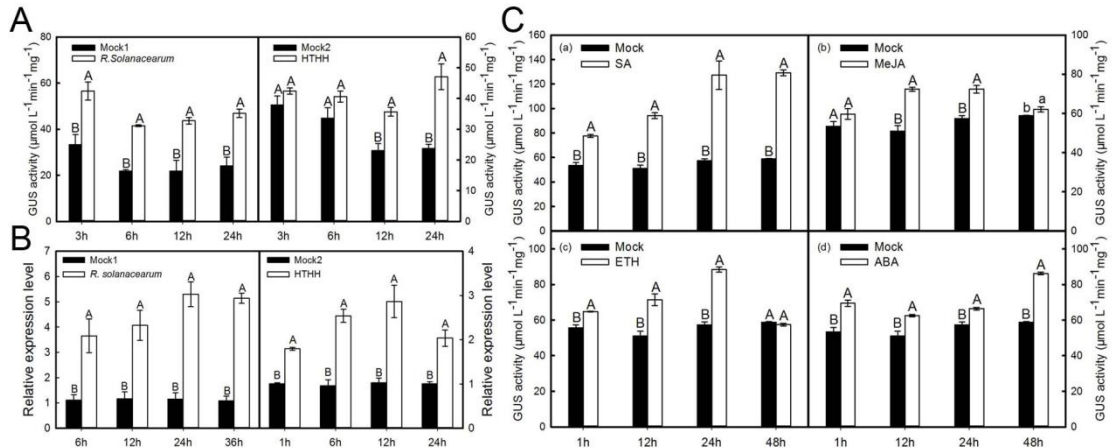

**Fig. S3.** The expression of *CabZIP63* was induced by RSI and HTHH as well as exogenous applied SA, MeJA, ETH or ABA. **(A)** The promoter fragment upstream the translation start code with 2000 bps in length was cloned into the vector of pDMC163 upstream GUS reporter gene and the generated *pCabZIP63::GUS* was transformed into *Agrobacterium* GV3101, which was further infiltrated into pepper leaves. At 24 hpi, the infiltrated leaves were further inoculated with *R. solanacearum* strain FJC100301, or treated with 38 °C under 90% of humidity, and the leaves were harvested at appropriate time points for GUS expression assay. Mock1 was the treatment of  $\text{MgCl}_2$  and Mock2 was the treatment of room temperature (25 °C) under 50% of humidity. **(B)** The transcript levels of *CabZIP63* measured at different time points in pepper leaves after RS inoculation and HTHH treatment, respectively, by real-time RT-PCR. **(C)** The expression of GUS driven by *pCabZIP63* was promoted by exogenous application of SA, MeJA, ETH or ABA. The leaves of pepper plants at 8-leaf stage were infiltrated with GV3101 cells ( $\text{OD}_{600} = 0.6$ ) containing *pCabZIP63::GUS*, at 24 hours later, the plants were sprayed with 1 mM SA (a), 100 $\mu\text{M}$  MeJA (b), 100 $\mu\text{M}$  ETH (c), or 100 $\mu\text{M}$  ABA (d), and the leaves were harvested at different time points for GUS activity assay by microplate reader using pepper leaves treated with ddH<sub>2</sub>O as mock. Data represent the means  $\pm$  SD from four independent biological replicates. Different capital letters indicate significant differences from four independent biological replicates based on the LSD test ( $P < 0.01$ ). Different lower-case letters indicate significant differences from three

independent experiments based on the LSD test ( $P < 0.05$ ).

**Fig. S4**

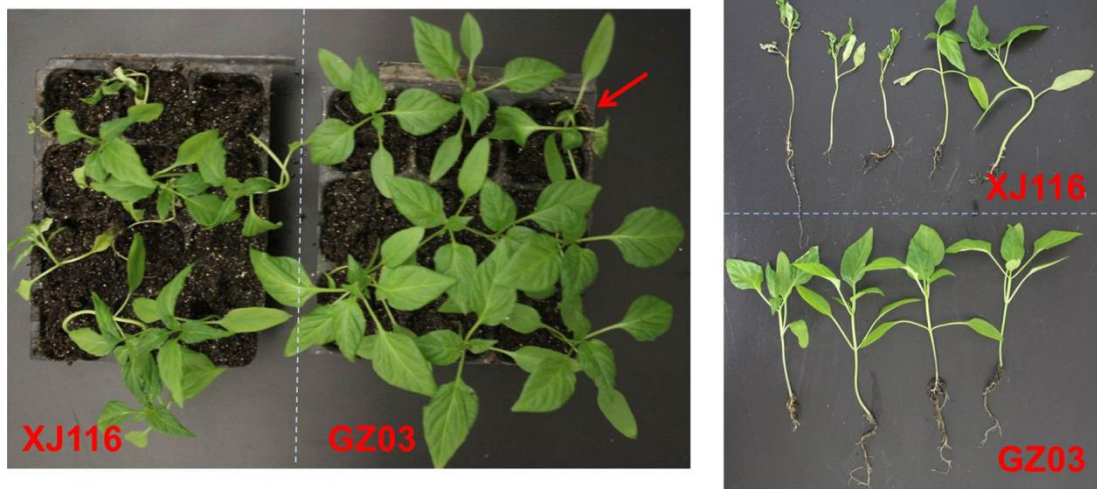

**Fig. S4.** The detection of virulence of *R. solanacearum* strain FJC100301 by root-irrigation. GZ03, an inbred line with middle level of resistance to *R. solanacearum*, and XJ116, another inbred line susceptible to *R. solanacearum* were used. Each pot containing one plant at of 6-8 leaf stage with its root injured was irrigated with 5ml FJC100301 suspension containing  $1 \times 10^5$  cells per milliliter, and then the pots were kept in a growth room under a condition of 28 °C and soil moisture was kept more than 90%. The result showed that 10 of the 12 XJ116 plants exhibited disease symptom, but only one of the 9 GZ03 plants exhibited faint blight symptom.

**Fig. S5**

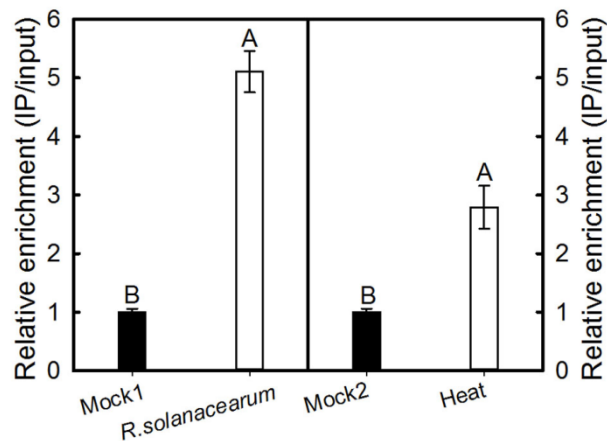

**Fig. S5.** The binding of CabZIP63 to pCaWRKY40 was promoted by RSI and HTHH. GV3101 cells containing 35S::CabZIP63-HA was infiltrated into pepper leaves, and the pepper plants were inoculated with *R. solanacearum* or treated with 38 °C under 90% of humidity at 24 hpt. At 48 hours later, the infiltrated leaves were harvested for chromatin preparation. Relative DNA amount pulled by CabZIP63-HA with the treatment of RSI and HTHH in pepper leaves were determined using real-time quantitative PCR analysis. Mock1 was the treatment of MgCl<sub>2</sub> and Mock2 was the treatment of room temperature (25 °C) under 50% of humidity. Relative enrichment levels of samples of MgCl<sub>2</sub> or room temperature were set to 1 after normalization by input. Data represent the means ± SD from four independent biological replicates. Different upper-case letters indicate significantly different means, as analyzed by Fisher's protected LSD test ( $P < 0.01$ ).

**Fig. S6**

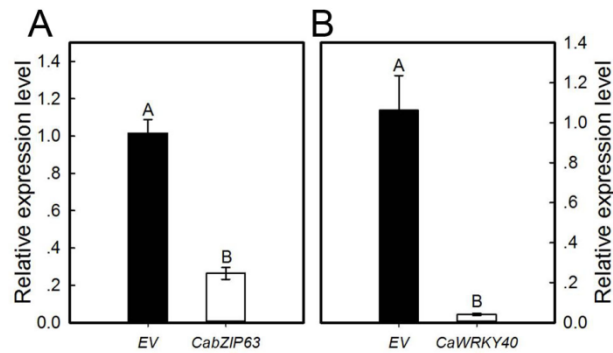

**Fig. S6.** Relative expression level of endogenous *CabZIP63* or *CaWRKY40* in *CabZIP63-SRDX* or *CaWRKY40-SRDX* transiently overexpressing pepper leaves by real-time RT-PCR. **(A)** Relative expression level of *CabZIP63* in *CabZIP63-SRDX* transiently overexpressing pepper leaves by real-time RT-PCR using the specific primers designed according to the 3' UTR of *CabZIP63*. **(B)** Relative expression level of *CaWRKY40* in *CaWRKY40-SRDX* transiently overexpressing pepper leaves by real-time RT-PCR using the specific primers designed according to the 3' UTR of *CaWRKY40*. Data represent the means  $\pm$  SD from four independent experiments. Different letters indicate significant differences, as determined by Fisher's protected LSD test ( $P < 0.01$ ).

**Table S1.** Grading standards for evaluation of disease resistance of pepper plant to *R. solanacearum* by root-irrigation.

| Disease level | Symptom Descriptions                                                                        |
|---------------|---------------------------------------------------------------------------------------------|
| 0             | No symptoms                                                                                 |
| 1             | The roots of asymptomatic; not wilting or a small amount of restorable wilting of leaves    |
| 2             | 1cm-2cm constriction of seedling root; non-recoverable wilting of leaves                    |
| 3             | The constriction of seedling root more than 2 cm; obvious wilting or abscission of leaves   |
| 4             | Constriction of seedling root; abscission of all leaves except as meristem or plant wilting |
| 5             | Plants withered                                                                             |



**Table S2.** Pepper primers used for vectors construction in this study.

| Gene                         | Forward primers (5' to 3')                              | Reverse primers (5' to 3')                                                                     | Size (bp) |
|------------------------------|---------------------------------------------------------|------------------------------------------------------------------------------------------------|-----------|
| <i>CabZIP63</i> <sup>1</sup> | GGGGACAAGTTTGTACAAAAAAGCAGGCTT<br>CATGGATAGCGTGTTCGGTG  | GGGGACCACTTTGTACAAGAAAGCTGGGTCTT<br>AAGTCACTCTATTGTTCTC                                        | 1272      |
| <i>CabZIP63</i> <sup>2</sup> | GGGGACAAGTTTGTACAAAAAAGCAGGCTT<br>CATGGATAGCGTGTTCGGTG  | GGGGACCACTTTGTACAAGAAAGCTGGGTCTT<br>TCACTCTATTGTTCTC                                           | 1269      |
| <i>CabZIP63</i> <sup>3</sup> | GGGGACAAGTTTGTACAAAAAAGCAGGCTT<br>CATGGATAGCGTGTTCGGTG  | GGGGACCACTTTGTACAAGAAAGCTGGGTCTT<br>AAGCGAAACCCAAACGGAGTCTAGATCCAGA<br>TCGAGAGTCACTCTATTGTTCTC | 1338      |
| <i>CabZIP63</i> <sup>4</sup> | GGGGACAAGTTTGTACAAAAAAGCAGGCTT<br>CCAACATTCATCTGTCAACTC | GGGGACCACTTTGTACAAGAAAGCTGGGTCTT<br>TTTCTCTCTCCTCCTAG                                          | 2000      |
| <i>CabZIP63</i> <sup>5</sup> | GGGGACAAGTTTGTACAAAAAAGCAGGCTT<br>CAAGGAAGATTCGCAGAC    | GGGGACCACTTTGTACAAGAAAGCTGGGTCCA<br>AAGGGGAAAAGAGTGA                                           | 229       |

<sup>1</sup> Primers for full-length *CabZIP63* cloning.

<sup>2</sup> Primers for the vector constructing of *35S::CabZIP63-83*.

<sup>3</sup> Primers for *CabZIP63-SRDX* cloning.

<sup>4</sup> Primers for full-length *CabZIP63* promoter cloning.

<sup>5</sup> Primers for the vector constructing of *TRV::CabZIP63*.

**Table S3.** Pepper primers used for real-time RT-PCR in this study.

| Gene                         | Accession no. | Forward primers (5' to 3')     | Reveres primers (5' to 3')     | Size (bps) |
|------------------------------|---------------|--------------------------------|--------------------------------|------------|
| <i>CabZIP63</i> <sup>a</sup> |               | AAGGAAGATTTTCGACAGAC           | CAAAGGGGAAAAGAGTGGA            | 229        |
| <i>CabZIP6</i> <sup>b</sup>  |               | ACGACATTGCCGATCAAITA           | GCAAACGATGCGGTATTAGA           | 226        |
| <i>CabZIP6</i> <sup>c</sup>  |               | TTAGATAICCTCCTATAGG            | ACGGAGTTCTAGATCCAGATC          | 207        |
| <i>CaWRKY40</i> <sup>d</sup> | AAX20040.1    | AAGTCCAGCAGAGCAGTCAA           | AACAATTGTCTAAGCCATCCG          | 152        |
| <i>CaWRKY40</i> <sup>e</sup> | AAX20040.1    | GGTGTGGCAGATGATAGTGC           | CCAGGCACAACATCCAAGT            | 122        |
| <i>CaWRKY40</i> <sup>f</sup> | AAX20040.1    | CAGAGTGCTAGTCTACCGGT           | ACGGAGTTCTAGATCCAGATC          | 219        |
| <i>CaPRI</i>                 | AF348141.1    | GCCGTGAAGATGTGGGTCAATGA        | TGAGTTACGCCAGACTACCTGAGTA      | 108        |
| <i>CaNPRI</i>                | X61679.1      | ACTTCTTCGCCGACGCCAAG           | GCCAACACATTCACCAGAGCATC        | 190        |
| <i>CaDEF1</i>                | AF442388      | GTGAGGAAGAAGTTTGAAAGAAAGTAC    | TGCACAGCACTATCATTGCATACAATTC   | 267        |
| <i>CaABRI</i>                | CA524559      | ATGACAGGCACAACAGAAGAAAAT       | AATAAGTTATGACAGAGCCATTTT       | 148        |
| <i>CaHSP24</i>               | HM132040      | GTTTCGTCTAGCAGTTTGGTTCGGTTG    | GTAATTTAACTAAACAGACTCTTACAACC  | 152        |
| <i>CaACTIN</i>               | GQ339766      | AGGGATGGGTCAAAGGATGC           | GAGACAACACCGCCTGAATAGC         | 225        |
| <i>18s rRNA</i>              | EF564281      | CCGGTCCGCCTATGGTGTGCACCGGTCGTC | GCAGTTGTTCGCTTTTCATAAATCCAAGAA | 285        |

<sup>a</sup>Specific primers for detecting relative expression of *CabZIP63* designed according to of the sequence in 3' UTR.

<sup>b</sup>Specific primers for detecting relative expression of *CabZIP63* designed according to of the sequence in ORF domain.

<sup>c</sup>Specific primers for detecting relative expression of *CabZIP63* designed according to of the sequence in ORF (Forward primer) and SRDX (Reveres primers) domain.

<sup>d</sup>Specific primers for detecting relative expression of *CaWRKY40* designed according to of the sequence in 3' UTR.

<sup>e</sup>Specific primers for detecting relative expression of *CaWRKY40* designed according to of the sequence in ORF domain.

<sup>f</sup>Specific primers for detecting relative expression of *CaWRKY40* designed according to of the sequence in ORF (Forward primer) and SRDX (Reveres primers) domain.

**Table S4.** Pepper primers used for ChIP PCR or real-time RT-PCR in this study.

| Primer name                 | Forward primers (5' to 3')      | Reveres primers (5' to 3')     |
|-----------------------------|---------------------------------|--------------------------------|
| ATTB                        | GGGGACAAGTTTGTACAAAAAAGCAGGCTTC | GGGGACCACTTTGTACAAGAAAGCTGGGTC |
| pCaWRKY40 C-box             | TATTCTCAAAAAATTCAATC            | ATTCAAGTGTTTGTITACAA           |
| pCaWRKY40 G-box             | AACCAAGATTGTACTATAGC            | AATTGCCCTTTTAAGAAGAG           |
| pCaWRKY40 mock <sup>b</sup> | TGCGGAAGCTATGTAGACCA            | TTTGATTCTGCTTGTGATA            |
| pCabZIP63 1 G-box           | TTTTATCAAACCTTAAAAGAAGAT        | ACATCTATGCTCCTATGGGATGGT       |
| pCabZIP63 2 G-box           | TACAACAAAATAATACAATACTG         | ATTGGGAAATATGATTCATGTT         |
| pCabZIP63 mock <sup>a</sup> | GAATAGTACTCCTAAATATG            | GATGAGCATCAATCATATTC           |
| pCaPR1 1W-box               | AGCTCCATCCCAAACCAACC            | TGGTGTGGGTCTGTGAGGC            |
| pCaNPR1 1W-box              | ATTCTCTGCATTAGTTA               | TGAAAAGAGTGACACCG              |
| pCaDEF1 1W-box              | AATCAGTGCCGACTGTGGGG            | GCGCACCTCGGCGCTGAGCT           |
| pCaHSP24 1W-box             | TTTGAICTCAATTTACTAGCG           | CGTAAACTATTGATATTTA            |

**Table S5.** The plant numbers with different level of disease resistance in VIGS assay of *CabZIP63* against *R. solanacearum* strain FJC100301 infection.

| Plant type            | infection grade |    |    |    |    |    | average<br>disease index | Plant<br>total |
|-----------------------|-----------------|----|----|----|----|----|--------------------------|----------------|
|                       | 0               | 1  | 2  | 3  | 4  | 5  |                          |                |
| TRV:: <i>CabZIP63</i> | 3               | 12 | 8  | 10 | 11 | 16 | 3.0                      | 60             |
| TRV::00               | 16              | 22 | 19 | 1  | 1  | 1  | 1.2                      | 60             |
